# Supplementary material for: Nanocurcumin and curcumin prevent N, N'-methylenebisacrylamide-induced liver damage and promotion of hepatic cancer cell growth
Source: PubMed Central journal article supplement (PMC9117224; doi:10.1038/s41598-022-12406-y), 2022-05-18

## The origin of western plot

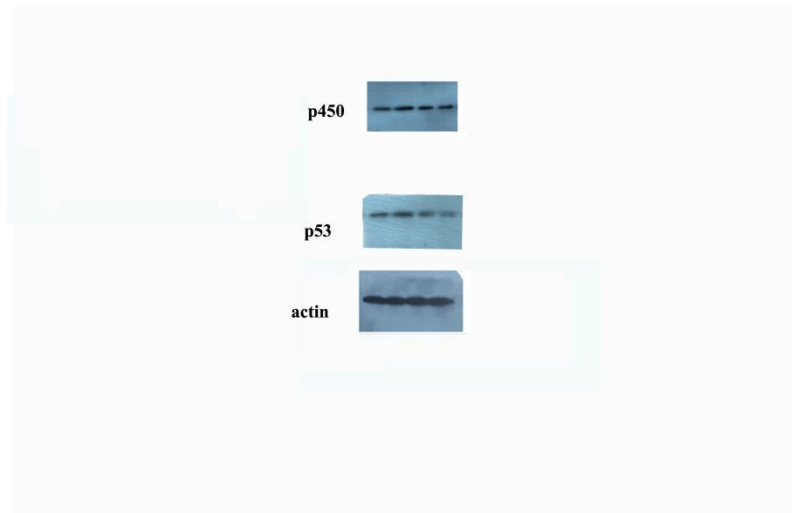

Supplement: 41598_2022_12406_MOESM1_ESM.pdf [file 41598_2022_12406_MOESM1_ESM.pdf]
